# Supplementary material for: Kefir and the Gut–Skin Axis
Source: Int J Environ Res Public Health. 2022 Oct 23;19(21):13791. doi: 10.3390/ijerph192113791 (PMC9653948; doi:10.3390/ijerph192113791)
Supplement: Supplementary file 1 [file ijerph-19-13791-s001.zip › ijerph-1955535-supplementary.pdf]

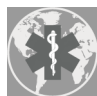

## Supplementary Material

**Supplemental Table S1** – Non-inclusion criteria.

| Non-inclusion criteria                                                                                                                                                                                                                                                                                                                                                                                                                                                                                                                                                                                                                                                                                                                                                                                                                                                                                                                                                                                   |
|----------------------------------------------------------------------------------------------------------------------------------------------------------------------------------------------------------------------------------------------------------------------------------------------------------------------------------------------------------------------------------------------------------------------------------------------------------------------------------------------------------------------------------------------------------------------------------------------------------------------------------------------------------------------------------------------------------------------------------------------------------------------------------------------------------------------------------------------------------------------------------------------------------------------------------------------------------------------------------------------------------|
| <ol style="list-style-type: none"><li>1. Regular consumption of kefir or any probiotic strains (as supplements or pharmaceuticals) in the 3 months prior to the study or during the study</li><li>2. Oncologic disease</li><li>3. Women pregnant or breastfeeding</li><li>4. Retinoid treatment in the 3 months prior to the study or during the study</li><li>5. Antibiotic treatment in the 30 days prior to the study or during the study</li><li>6. Topical treatment with corticosteroids / anti-inflammatories in the study area in the 8 days prior to the study or during the study</li><li>7. Chronic illness involving taking regular (daily) medications such as insulin, oral antidiabetics, anti-inflammatories or immunosuppressants</li><li>8. Skin disease in the study areas</li><li>9. Cosmetic treatment on the skin, scrubbing, or depilation at the study areas in the 30 days, or during the study period</li><li>10. Failure to comply with the guidelines of the study</li></ol> |

**Supplemental Table S2** – Baseline GI status parameters for each study group (relative frequency).

| Baseline GI Status                                 | Healthy Group<br>(n = 33) |           |                 | Atopic Group<br>(n = 19) |          |                 |
|----------------------------------------------------|---------------------------|-----------|-----------------|--------------------------|----------|-----------------|
|                                                    | HK                        | H0        | <i>p</i> -Value | AK                       | A0       | <i>p</i> -Value |
| Functional constipation, % (n)                     | 38.5 (5)                  | 25.0 (5)  | 0.076           | 55.6 (5)                 | 60.0 (6) | 0.956           |
| Functional diarrhea, % (n)                         | 30.8 (4)                  | 25.0 (5)  | 0.452           | 22.2 (2)                 | 40.0 (4) | 0.405           |
| Dejection frequency > 3 times per day, % (n)       | 30.8 (4)                  | 25.0 (5)  | 0.178           | 22.2 (2)                 | 20.0 (2) | 0.362           |
| Intensity of abdominal discomfort $\geq 5$ , % (n) | 23.1 (3)                  | 5.0 (1)   | 0.438           | 66.7 (6)                 | 60.0 (6) | 0.634           |
| Functional abdominal distension, % (n)             | 53.8 (7)                  | 55.0 (11) | 0.449           | 88.9 (8)                 | 90.0 (9) | 0.242           |
| Flatulence frequency, % (n)                        | 61.5 (8)                  | 55.0 (11) | 0.832           | 88.9 (8)                 | 90.0 (9) | 0.782           |
| Associated discomfort, % (n)                       | 30.8 (4)                  | 35.0 (7)  | 0.136           | 88.9 (8)                 | 70.0 (7) | 0.563           |
| Belching, % (n)                                    | 15.4 (2)                  | 25.0 (5)  | 0.784           | 55.6 (5)                 | 30.0 (3) | 0.413           |
| Fullness sensation, % (n)                          | 30.8 (4)                  | 25.0 (5)  | 0.716           | 33.3 (3)                 | 50.0 (5) | 0.312           |
| Headache, % (n)                                    | 92.3 (12)                 | 65.0 (13) | 0.076           | 55.6 (5)                 | 70.0 (7) | 0.445           |

Groups were compared by Chi-Square test, with  $p < 0.05$  for statistical significance. n.a.- not applicable, outcome is constant.

**Supplemental Table S3** – Individual variation in GI status, between t8 and t0 (Wilcoxon Standartized (Z) test statistic (p-value)).

| GI STATUS                                  | Healthy Group<br>(n = 33) |                | Atopic Group<br>(n = 19) |                  |
|--------------------------------------------|---------------------------|----------------|--------------------------|------------------|
|                                            | HK                        | H0             | AK                       | A0               |
| Functional constipation                    | -2.236 (0.025)            | 0.000 (1.000)  | -2.707 ( <b>0.038</b> )  | -1.000 (0.317)   |
| Functional diarrhea                        | -2.000 ( <b>0.046</b> )   | 0.000 (1.000)  | -1.000 (0.317)           | -1.414 (0.157)   |
| Dejection frequency > 3 times per day      | -1.633 (0.102)            | 0.000 (1.000)  | -1.342 (0.180)           | -1.414 (0.157)   |
| Intensity of abdominal discomfort $\geq 5$ | -1.841 (0.066)            | 0.000 (1.000)  | -1.612 (0.107)           | -1.214 (0.225)   |
| Functional abdominal distension            | -2.646 ( <b>0.008</b> )   | 0.000 (1.000)  | -2.271 ( <b>0.023</b> )  | -0.577 (0.564)   |
| Flatulence frequency                       | -2.236 ( <b>0.025</b> )   | -1.414 (0.157) | -1.947 (0.052)           | -0.333 (0.739)   |
| Associated discomfort                      | -1.633 (0.102)            | 0.000 (1.000)  | -2.428 ( <b>0.015</b> )  | -1.265 (0.206)   |
| Belching                                   | -1.414 (0.157)            | 0.000 (1.000)  | -1.890 (0.059)           | -1.342 (0.180)   |
| Fullness sensation                         | 0.000 (1.000)             | 0.000 (1.000)  | -1.342 (0.180)           | -0.447 (0.655)   |
| Headache                                   | -1.857 (0.063)            | 0.000 (1.000)  | -1.633 (0.102)           | -0.447 (0.655) ¥ |

HK – Healthy skin with kefir intake; H0 - Healthy skin without kefir intake; AK – Atopic skin with kefir intake; A0 – Atopic skin without kefir intake. Individuals were compared by Wilcoxon signed rank test, with  $p < 0.05$  for statistical significance. ¥ - based on negative ranks (variable at t0 < variable at t8).
